# Supplementary material for: Emergence, development and diversification of the TGF-β signalling pathway within the animal kingdom
Source: PubMed Central journal article supplement (PMC2657120; doi:10.1186/1471-2148-9-28), 2009-02-03
Supplement: 1471-2148-9-28-S2.pdf [file 1471-2148-9-28-S2.pdf]

type I receptors

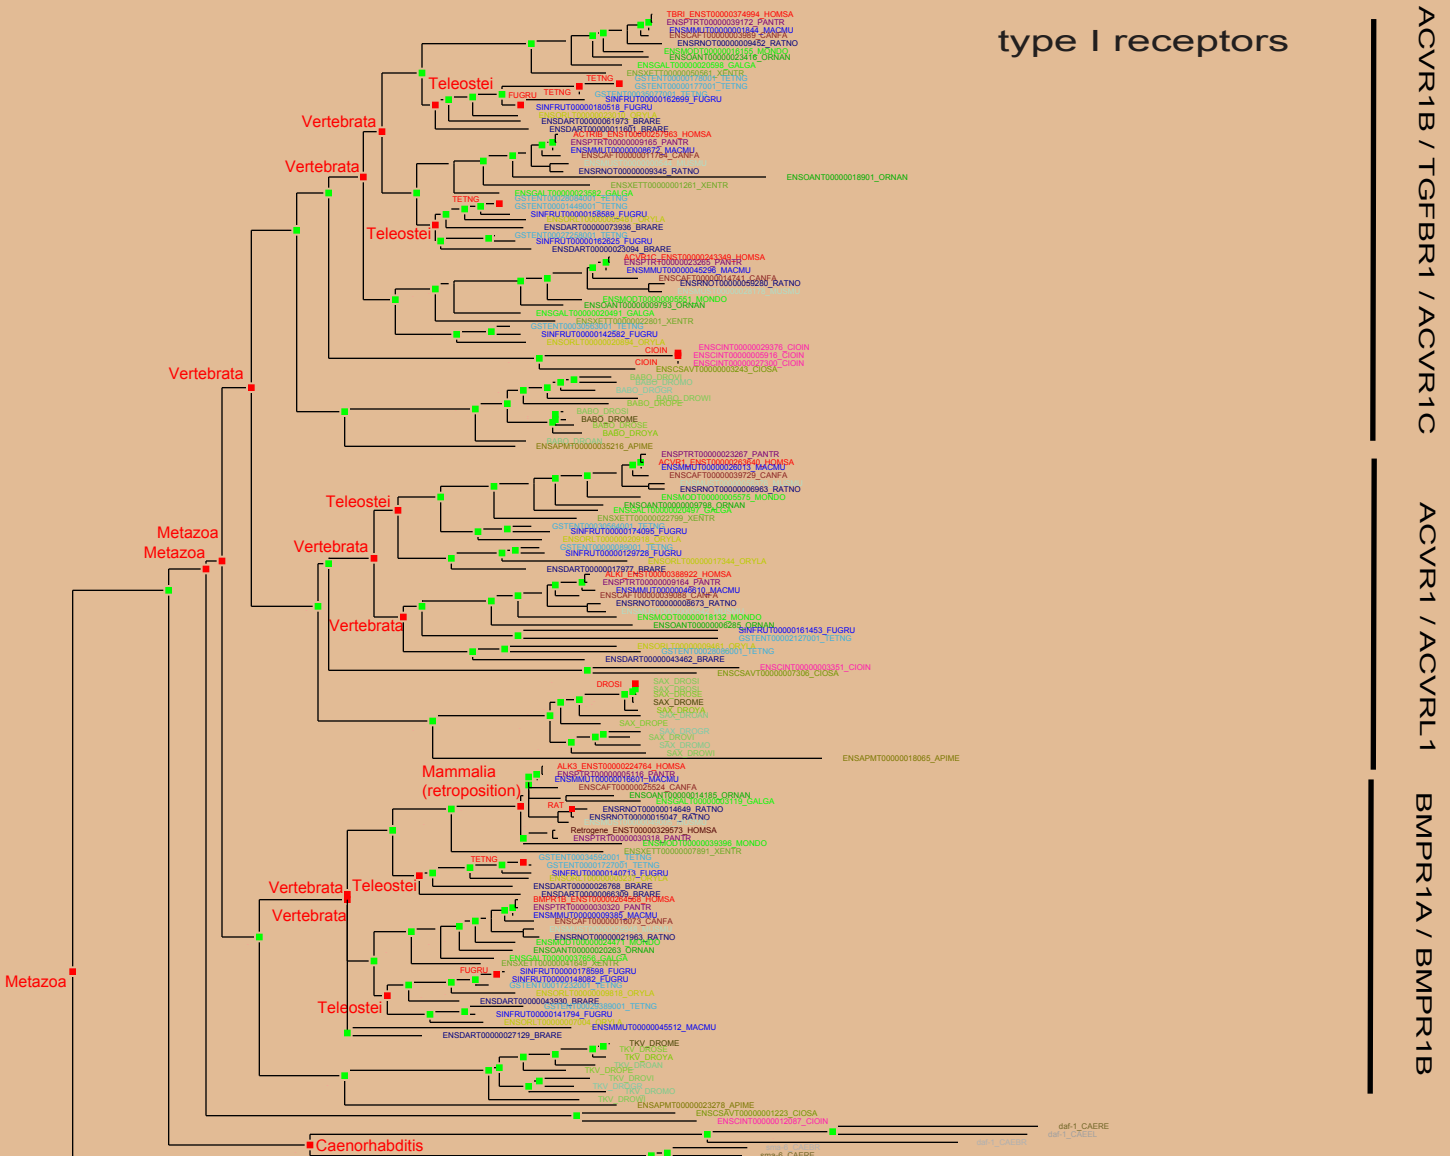

ACVR1B / TGFB1 / ACVR1C  
 ACVR1 / ACVR11  
 BMPR1A / BMPR1B

type II receptors

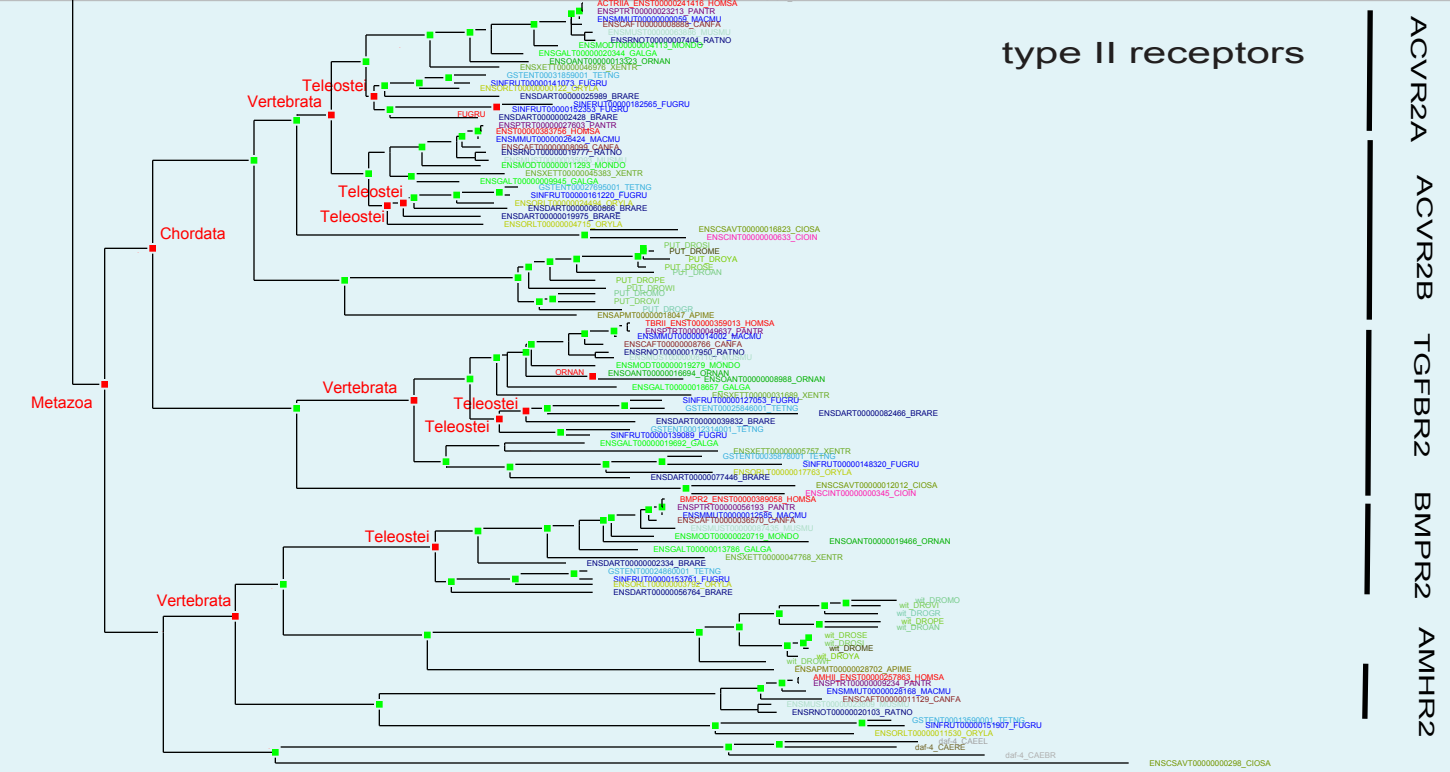

ACVR2A  
 ACVR2B  
 TGFB2  
 BMPR2  
 AMHR2

Figure S2
