# Supplementary material for: Emergence, development and diversification of the TGF-β signalling pathway within the animal kingdom
Source: PubMed Central journal article supplement (PMC2657120; doi:10.1186/1471-2148-9-28), 2009-02-03
Supplement: 1471-2148-9-28-S3.pdf [file 1471-2148-9-28-S3.pdf]

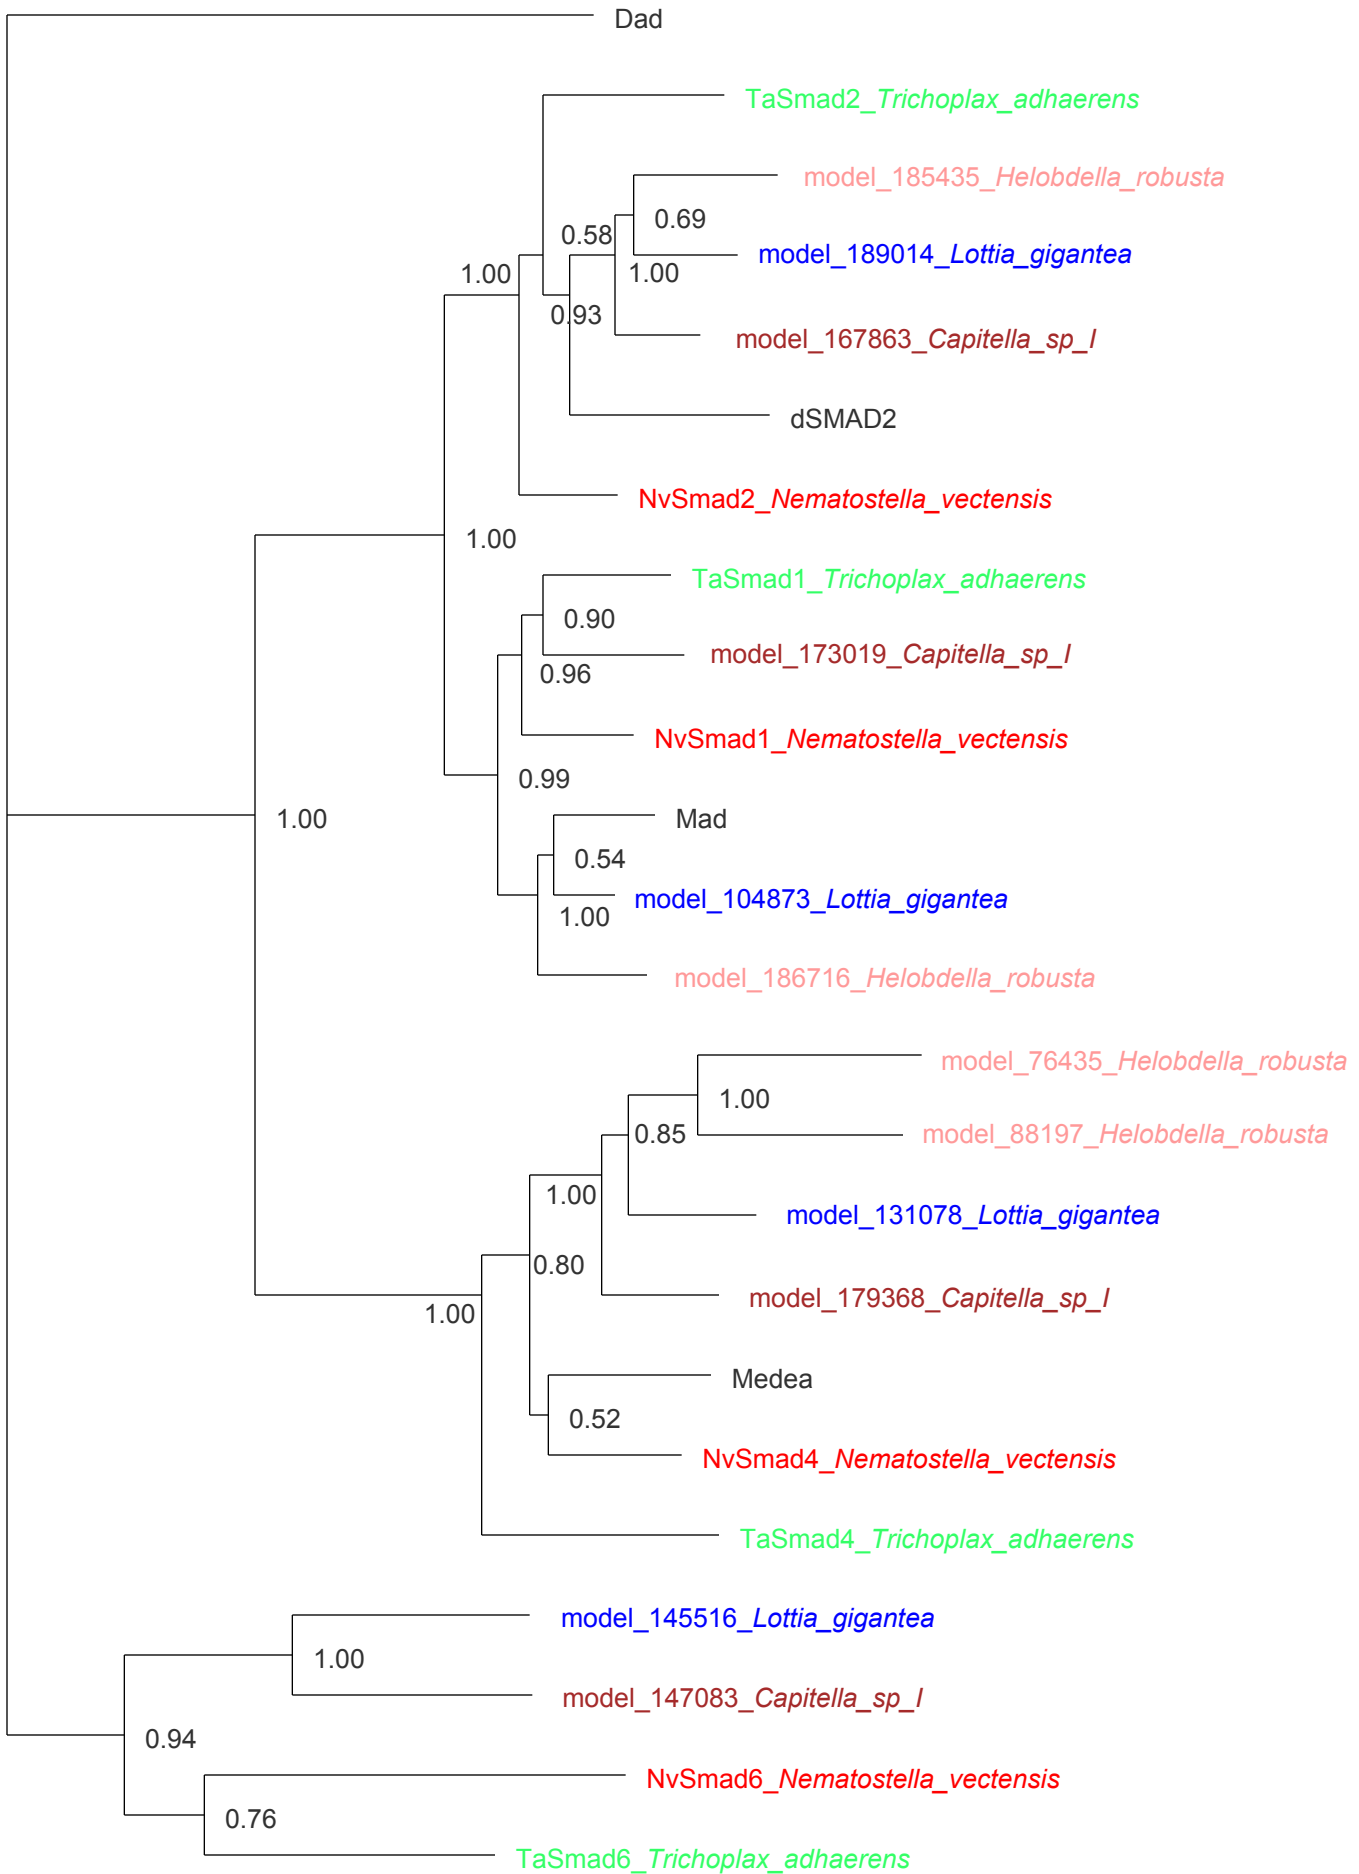

Figure S3
